# Supplementary material for: Lanthanide-MOFs as multifunctional luminescent sensors
Source: Royal Society of Chemistry journal article supplement (doi:10.1039/d2qi00682k), 2022-01-01
Supplement: d2qi00682k1.pdf [file d2qi00682k1.pdf]

## Lanthanide-MOFs as Multifunctional luminescence Sensors

Sibo Wang,<sup>a</sup> Bo Sun,<sup>c</sup> Zhongmin Su,<sup>\*c</sup> Guohui Hong,<sup>a</sup> Xiao Li,<sup>\*bc</sup> Yanling Liu,<sup>d</sup> Qingqing Pan,<sup>c</sup> Jing Sun<sup>c\*</sup>

<sup>a</sup> School of Materials science and Engineering, Changchun University of Science and Technology, Changchun 130022, People's Republic of China.

<sup>b</sup> Laboratory of Preparation and Application of Environmental Friendly Materials (Jilin Normal University), Ministry of Education, Changchun, 130103, China.

<sup>c</sup> School of Chemistry and Environmental Engineering, Changchun University of Science and Technology, Jilin Provincial Science and Technology Innovation Center of Optical Materials and Chemistry, Jilin Provincial International Joint Research Center of Photofunctional Materials and Chemistry, Changchun, 130022, China.

<sup>d</sup> Chemistry and Chemical Engineering, Hainan Normal University, Hainan, 571158, People's Republic of China.

### 1. Experimental

**Materials and General Methods:** All reagents and solvents employed were commercially available and used without further purification. H<sub>6</sub>BDPO was synthesized by a modified literature method.<sup>1</sup> Infrared spectra were obtained from KBr pellets in a wavelength ranging from 4000–400 cm<sup>-1</sup> on a Nicolet 380 FT-IR spectrophotometer and UV-vis absorption was performed on U-3010 spectrophotometer (Hitachi, Japan). Photoluminescence spectra were recorded on a FL-4600 FL spectrophotometer. Powder X-Ray diffraction (PXRD) patterns were acquired on a Siemens D5005 automated diffractometer with Cu K $\alpha$  ( $\lambda = 1.5418 \text{ \AA}$ ) radiation. Thermogravimetric analysis (TGA) was conducted on a Perkin-Elmer FLS-920 analyzer heated from ambient temperature to 1000 °C under argon atmosphere at a ramp rate of 5 °C min<sup>-1</sup>.

**Crystallography:** Single crystal X-ray diffraction analyses of CUST-623 - CUST-627 were obtained on a Bruker SMART APEX II CCD diffractometer equipped with a graphite monochromator using Mo K $\alpha$  radiation ( $\lambda = 0.71073 \text{ \AA}$ ) at 296 K. A multiscan technique was used to perform adsorption corrections. All of the structures were solved using direct methods and refined using the full matrix least-squares method on F<sup>2</sup> with anisotropic thermal parameters for all non-hydrogen atoms using the SHELXL-97 program.<sup>2</sup> All hydrogen atoms were located in calculated positions and refined isotropically. The crystal data and structure refinement results of CUST-623 - CUST-627 are summarized in Table S1.

**Synthesis of Eu<sub>x</sub>Tb<sub>0.02-x</sub>-MOF:** The synthesis of ( $x=0.002, 0.004, 0.006, 0.008, 0.010, 0.012, 0.014, 0.016, 0.018$ ) are the same as that of CUST-623. Replace Ln(NO<sub>3</sub>)<sub>3</sub>·6H<sub>2</sub>O with a mixture of Eu(NO<sub>3</sub>)<sub>3</sub>·6H<sub>2</sub>O and Tb(NO<sub>3</sub>)<sub>3</sub>·6H<sub>2</sub>O, and keep the total mass amount of Eu<sup>3+</sup> and Tb<sup>3+</sup> unchanged at 0.02 g. The contents of Eu<sup>3+</sup> and Tb<sup>3+</sup> ions in Eu<sub>x</sub>Tb<sub>0.02-x</sub>-MOF were confirmed using inductively coupled plasma spectroscopy (ICPS) (Table S4).

**Preparation of Ln-MOFs@PVA:** Disperse 2 g of polyvinyl alcohol (PVA 1788) in 10 ml of cold water for 12 h and heat in 95 °C water bath for 3 h to allow PVA to dissolve sufficiently. Add 2 g MOFs to the cooled PVA solution and stir vigorously to mix well. Finally, put the mixture into the mold to form films.

**Luminescence sensing experiment:** For the experiments of luminescence sensing, 3 mg of Ln-MOF powders were added into 3.00 mL of M(NO<sub>3</sub>)<sub>x</sub> (M=Al<sup>3+</sup>, K<sup>+</sup>, Mg<sup>2+</sup>, Ca<sup>2+</sup>, Mn<sup>2+</sup>, Cd<sup>2+</sup>, Zn<sup>2+</sup>, Cu<sup>2+</sup>, Ag<sup>+</sup>, Hg<sup>2+</sup>, Na<sup>+</sup>, Fe<sup>3+</sup>, Pb<sup>2+</sup>), KX (X=I<sup>-</sup>, Br<sup>-</sup>, NO<sub>3</sub><sup>-</sup>, Cl<sup>-</sup>, CO<sub>3</sub><sup>2-</sup>, F<sup>-</sup>, C<sub>2</sub>O<sub>4</sub><sup>2-</sup>, CrO<sub>4</sub><sup>2-</sup>, Cr<sub>2</sub>O<sub>7</sub><sup>2-</sup>, CN<sup>-</sup>) or explosives water solutions, sonicated for 30 minutes to obtain the suspensions. When the suspensions were stayed to be stable enough, they can be used for measurements.

## 2. Computational Details.

The fluorescence quenching was analyzed using the Stern-Volmer equations:<sup>3</sup>

$$(I_0/I) = K_{sv}[M] + 1$$

where  $I_0$  and  $I$  are the fluorescence intensity, in the absence and presence of analyte,

respectively,  $K_{sv}$  is the Stern-Volmer quenching constant and  $[M]$  is the concentration of analyte.

The limit of detection concentration (LOD) was calculated according to the formula:<sup>4</sup>

$$LOD = 3\delta/K_{sv}$$

and  $\delta$  is the standard deviation of the detection method.

The relative sensitivity is obtained according to the formula:<sup>5</sup>

$$S_r = \frac{(\partial\Delta/\partial T)}{\Delta}$$

**Table S1.** Crystal data and structure refinement for CUST-623 - CUST-627

|                                | CUST-623                                                         | CUST-624                                                          | CUST-625                                                         | CUST-626                                                         | CUST-627                                                          |
|--------------------------------|------------------------------------------------------------------|-------------------------------------------------------------------|------------------------------------------------------------------|------------------------------------------------------------------|-------------------------------------------------------------------|
| Empirical formula              | C <sub>18</sub> H <sub>16</sub> EuN <sub>2</sub> O <sub>14</sub> | C <sub>18</sub> H <sub>16</sub> N <sub>2</sub> O <sub>14</sub> Tb | C <sub>18</sub> H <sub>16</sub> GdN <sub>2</sub> O <sub>14</sub> | C <sub>18</sub> H <sub>16</sub> DyN <sub>2</sub> O <sub>14</sub> | C <sub>18</sub> H <sub>16</sub> N <sub>2</sub> O <sub>14</sub> Sm |
| CCDC No.                       | 2161782                                                          | 2161779                                                           | 2161780                                                          | 2161781                                                          | 2161783                                                           |
| Formula weight                 | 636.29                                                           | 643.25                                                            | 641.58                                                           | 646.83                                                           | 634.68                                                            |
| Temperature/K                  | 296.15                                                           | 296.15                                                            | 296.15                                                           | 296.15                                                           | 296.15                                                            |
| Crystal system                 | monoclinic                                                       | monoclinic                                                        | monoclinic                                                       | monoclinic                                                       | monoclinic                                                        |
| Space group                    | P2 <sub>1</sub> /c                                               | P2 <sub>1</sub> /c                                                | P2 <sub>1</sub> /c                                               | P2 <sub>1</sub> /c                                               | P2 <sub>1</sub> /c                                                |
| a/Å                            | 7.0504(10)                                                       | 7.063(4)                                                          | 7.016(6)                                                         | 7.0224(9)                                                        | 7.0381(6)                                                         |
| b/Å                            | 16.530(3)                                                        | 16.544(8)                                                         | 16.367(15)                                                       | 16.465(2)                                                        | 16.5007(15)                                                       |
| c/Å                            | 20.371(3)                                                        | 20.320(10)                                                        | 20.184(19)                                                       | 20.263(3)                                                        | 20.3416(19)                                                       |
| $\alpha$ /°                    | 90                                                               | 90                                                                | 90                                                               | 90                                                               | 90                                                                |
| $\beta$ /°                     | 96.489(5)                                                        | 96.432(7)                                                         | 96.619(14)                                                       | 96.353(3)                                                        | 96.410(2)                                                         |
| $\gamma$ /°                    | 90                                                               | 90                                                                | 90                                                               | 90                                                               | 90                                                                |
| Volume/Å <sup>3</sup>          | 2358.9(6)                                                        | 2359(2)                                                           | 2302(4)                                                          | 2328.6(5)                                                        | 2347.6(4)                                                         |
| Z                              | 4                                                                | 4                                                                 | 4                                                                | 4                                                                | 4                                                                 |
| $\rho_{calc}$ /cm <sup>3</sup> | 1.792                                                            | 1.811                                                             | 1.851                                                            | 1.845                                                            | 1.796                                                             |
| $\mu$ /mm <sup>-1</sup>        | 2.732                                                            | 3.071                                                             | 2.955                                                            | 3.283                                                            | 2.575                                                             |
| F(000)                         | 1252.0                                                           | 1260.0                                                            | 1256.0                                                           | 1264.0                                                           | 1248.0                                                            |

|                            |                                                   |                                                   |                                                   |                                                   |                                                   |
|----------------------------|---------------------------------------------------|---------------------------------------------------|---------------------------------------------------|---------------------------------------------------|---------------------------------------------------|
| Reflections collected      | 40864                                             | 13569                                             | 13628                                             | 18140                                             | 19201                                             |
| Data /parameters           | 4186/329                                          | 4273/329                                          | 4367/333                                          | 5498/350                                          | 5664/357                                          |
| Gof on F <sup>2</sup>      | 1.091                                             | 1.063                                             | 1.073                                             | 1.126                                             | 1.079                                             |
| Final R indexes [I>=2σ(I)] | R <sub>1</sub> = 0.0245, wR <sub>2</sub> = 0.0633 | R <sub>1</sub> = 0.0238, wR <sub>2</sub> = 0.0603 | R <sub>1</sub> = 0.0263, wR <sub>2</sub> = 0.0694 | R <sub>1</sub> = 0.0250, wR <sub>2</sub> = 0.0621 | R <sub>1</sub> = 0.0239, wR <sub>2</sub> = 0.0480 |
| Final R indexes [all data] | R <sub>1</sub> = 0.0281, wR <sub>2</sub> = 0.0649 | R <sub>1</sub> = 0.0271, wR <sub>2</sub> = 0.0618 | R <sub>1</sub> = 0.0314, wR <sub>2</sub> = 0.0723 | R <sub>1</sub> = 0.0265, wR <sub>2</sub> = 0.0627 | R <sub>1</sub> = 0.0299, wR <sub>2</sub> = 0.0498 |
| R <sub>int</sub>           | 0.0406                                            | 0.0303                                            | 0.0353                                            | 0.0207                                            | 0.0247                                            |

---

$R_1^a = \Sigma |F_o| - |F_c| / \Sigma |F_o|$ ,  $wR_2^b = [\Sigma [w(F_o^2 - F_c^2)^2] / \Sigma [w(F_o^2)^2]]^{1/2}$

**Table S2.** Selected bond lengths (Å) for CUST-623 - CUST-627

| Bond                                                         | Angle (°)  | Bond                 | Angle (°)  |
|--------------------------------------------------------------|------------|----------------------|------------|
| Eu1-O1 <sup>1</sup>                                          | 2.460(3)   | Eu1-O6               | 2.463(3)   |
| Eu1-O2                                                       | 2.506(3)   | Eu1-O7               | 2.326(3)   |
| Eu1-O4                                                       | 2.452(3)   | Eu1-O8 <sup>2</sup>  | 2.543(3)   |
| Eu1-O5 <sup>1</sup>                                          | 2.551(3)   | Eu1-O12 <sup>2</sup> | 2.406(3)   |
| <sup>1</sup> -2+X,1/2-Y,-1/2+Z; <sup>2</sup> -X,-1/2+Y,1/2-Z |            |                      |            |
| Bond                                                         | Angle (°)  | Bond                 | Angle (°)  |
| Tb1-O2 <sup>1</sup>                                          | 2.537(3)   | Tb1-O5 <sup>1</sup>  | 2.443(2)   |
| Tb1-O3                                                       | 2.427(3)   | Tb1-O6               | 2.308(2)   |
| Tb1-O4                                                       | 2.442(3)   | Tb1-O7 <sup>2</sup>  | 2.539(3)   |
| Tb1-O5 <sup>1</sup>                                          | 2.443(2)   | Tb1-O8               | 2.478(3)   |
| <sup>1</sup> -2+X,1/2-Y,-1/2+Z; <sup>2</sup> -1-X,1-Y,1-Z    |            |                      |            |
| Bond                                                         | Angle (°)  | Bond                 | Angle (°)  |
| Gd1-O1 <sup>1</sup>                                          | 2.521(4)   | Gd1-O5 <sup>2</sup>  | 2.528(3)   |
| Gd1-O3                                                       | 2.436(3)   | Gd1-O6               | 2.424(3)   |
| Gd1-O4                                                       | 2.295(3)   | Gd1-O7               | 2.472(3)   |
| Gd1-O5 <sup>2</sup>                                          | 2.528(3)   | Gd1-O8 <sup>1</sup>  | 2.430(3)   |
| <sup>1</sup> 2+X,3/2-Y,1/2+Z; <sup>2</sup> 3-X,1-Y,1-Z       |            |                      |            |
| Bond                                                         | Angle (°)  | Bond                 | Angle (°)  |
| Dy1-O1 <sup>1</sup>                                          | 2.520(2)   | Dy1-O5 <sup>1</sup>  | 2.426(2)   |
| Dy1-O2                                                       | 2.295(2)   | Dy1-O6               | 2.523(2)   |
| Dy1-O3                                                       | 2.408(2)   | Dy1-O9               | 2.367(2)   |
| Dy1-O4                                                       | 2.418(3)   | Dy1-O12              | 2.416(2)   |
| <sup>1</sup> 1-X,-1/2+Y,3/2-Z; <sup>2</sup> -1-X,1-Y,1-Z     |            |                      |            |
| Bond                                                         | Angle (°)  | Bond                 | Angle (°)  |
| Sm1-O1 <sup>1</sup>                                          | 2.5564(18) | Sm1-O5               | 2.3305(18) |
| Sm1-O2 <sup>2</sup>                                          | 2.5481(18) | Sm1-O7 <sup>1</sup>  | 2.4695(18) |
| Sm1-O3                                                       | 2.4638(19) | Sm1-O9               | 2.511(2)   |
| Sm1-O4                                                       | 2.456(2)   | Sm1-O10              | 2.457(2)   |
| <sup>1</sup> 2+X,1/2-Y,1/2+Z; <sup>2</sup> 3-X,1-Y,1-Z       |            |                      |            |

**Table S3.** Selected angles (°) for CUST-623 - CUST-627

| Bond                                 | Angle (°) | Bond                   | Angle (°)  | Bond                                  | Angle (°) |
|--------------------------------------|-----------|------------------------|------------|---------------------------------------|-----------|
| O1 <sup>1</sup> -Eu1-O2              | 77.73(10) | O6-Eu1-O8 <sup>2</sup> | 138.85(10) | O12 <sup>2</sup> -Eu1-O8 <sup>2</sup> | 52.57(9)  |
| O1 <sup>1</sup> -Eu1-O5 <sup>1</sup> | 51.63(8)  | O7-Eu1-O1 <sup>1</sup> | 136.68(11) | O12 <sup>2</sup> -Eu1-O13             | 76.77(12) |

|                                      |           |                                       |            |                                       |            |
|--------------------------------------|-----------|---------------------------------------|------------|---------------------------------------|------------|
| O1 <sup>1</sup> -Eu1-O6              | 127.36(9) | O7-Eu1-O2                             | 70.94(9)   | O13-Eu1-O2                            | 135.89(11) |
| O1 <sup>1</sup> -Eu1-O8 <sup>2</sup> | 74.06(9)  | O7-Eu1-O4                             | 72.98(10)  | O13-Eu1-O5 <sup>1</sup>               | 73.21(11)  |
| O1 <sup>1</sup> -Eu1-O13             | 99.54(11) | O7-Eu1-O5 <sup>1</sup>                | 135.88(10) | O13-Eu1-O6                            | 70.41(10)  |
| O2-Eu1-O5 <sup>1</sup>               | 71.16(10) | O7-Eu1-O6                             | 73.43(10)  | O12 <sup>2</sup> -Eu1-O4              | 82.09(11)  |
| O2-Eu1-O8 <sup>2</sup>               | 143.98(9) | O7-Eu1-O8 <sup>2</sup>                | 117.39(9)  | O12 <sup>2</sup> -Eu1-O5 <sup>1</sup> | 148.07(11) |
| O4-Eu1-O1 <sup>1</sup>               | 70.97(9)  | O7-Eu1-O12 <sup>2</sup>               | 71.40(9)   | O12 <sup>2</sup> -Eu1-O6              | 103.28(10) |
| O4-Eu1-O2                            | 76.08(10) | O8 <sup>2</sup> -Eu1-O5 <sup>1</sup>  | 106.50(9)  | O4-Eu1-O13                            | 145.38(10) |
| O4-Eu1-O5 <sup>1</sup>               | 117.94(9) | O7-Eu1-O6                             | 73.43(10)  | O6-Eu1-O2                             | 76.75(10)  |
| O4-Eu1-O6                            | 142.08(9) | O12 <sup>2</sup> -Eu1-O1 <sup>1</sup> | 125.17(10) | O6-Eu1-O5 <sup>1</sup>                | 76.68(9)   |

<sup>1</sup>-2+X,1/2-Y,-1/2+Z; <sup>2</sup>-X,-1/2+Y,1/2-Z; <sup>3</sup>2+X,1/2-Y,1/2+Z; <sup>4</sup>-X,1/2+Y,1/2-Z

| Bond                                 | Angle (°)  | Bond                                 | Angle (°)  | Bond                                  | Angle (°)  |
|--------------------------------------|------------|--------------------------------------|------------|---------------------------------------|------------|
| O2 <sup>1</sup> -Tb1-O7 <sup>2</sup> | 106.30(9)  | O5 <sup>1</sup> -Tb1-O7 <sup>2</sup> | 73.49(9)   | O8-Tb1-O7 <sup>2</sup>                | 143.79(9)  |
| O3-Tb1-O2 <sup>1</sup>               | 118.23(9)  | O5 <sup>1</sup> -Tb1-O8              | 77.86(9)   | O10 <sup>2</sup> -Tb1-O3              | 82.43(11)  |
| O3-Tb1-O4                            | 142.32(9)  | O6-Tb1-O2 <sup>1</sup>               | 135.98(9)  | O10 <sup>2</sup> -Tb1-O4              | 103.24(10) |
| O3-Tb1-O5 <sup>1</sup>               | 70.93(9)   | O6-Tb1-O3                            | 73.20(10)  | O10 <sup>2</sup> -Tb1-O5 <sup>1</sup> | 125.15(10) |
| O3-Tb1-O7 <sup>2</sup>               | 73.60(9)   | O6-Tb1-O4                            | 73.60(10)  | O10 <sup>2</sup> -Tb1-O7 <sup>2</sup> | 52.98(8)   |
| O3-Tb1-O8                            | 76.45(10)  | O6-Tb1-O5 <sup>1</sup>               | 137.02(10) | O10 <sup>2</sup> -Tb1-O8              | 141.05(9)  |
| O4-Tb1-O2 <sup>1</sup>               | 76.16(8)   | O6-Tb1-O7 <sup>2</sup>               | 117.53(9)  | O10 <sup>2</sup> -Tb1-O13             | 76.27(11)  |
| O4-Tb1-O5 <sup>1</sup>               | 127.19(9)  | O6-Tb1-O8                            | 71.35(9)   | O13-Tb1-O2 <sup>1</sup>               | 73.04(10)  |
| O4-Tb1-O7 <sup>2</sup>               | 139.19(10) | O6-Tb1-O10 <sup>2</sup>              | 71.37(9)   | O13-Tb1-O3                            | 144.88(10) |
| O4-Tb1-O8                            | 76.48(10)  | O6-Tb1-O13                           | 123.80(10) | O13-Tb1-O4                            | 70.76(10)  |
| O5 <sup>1</sup> -Tb1-O2 <sup>1</sup> | 51.96(8)   | O8-Tb1-O2 <sup>1</sup>               | 71.01(9)   | O8-Tb1-O7 <sup>2</sup>                | 143.79(9)  |

<sup>1</sup>-2+X,1/2-Y,-1/2+Z; <sup>2</sup>-1-X,1-Y,1-Z; <sup>3</sup>2+X,1/2-Y,1/2+Z

| Bond                                 | Angle (°)  | Bond                                 | Angle (°)  | Bond                                  | Angle (°)  |
|--------------------------------------|------------|--------------------------------------|------------|---------------------------------------|------------|
| O1 <sup>1</sup> -Gd1-O5 <sup>2</sup> | 105.93(10) | O4-Gd1-O13                           | 123.69(11) | O8 <sup>1</sup> -Gd1-O7               | 77.62(11)  |
| O3-Gd1-O1 <sup>1</sup>               | 76.64(10)  | O6-Gd1-O1 <sup>1</sup>               | 118.11(9)  | O12 <sup>2</sup> -Gd1-O3              | 103.46(11) |
| O3-Gd1-O5 <sup>2</sup>               | 139.02(11) | O6-Gd1-O3                            | 141.86(10) | O12 <sup>2</sup> -Gd1-O5 <sup>2</sup> | 52.80(10)  |
| O3-Gd1-O7                            | 76.67(11)  | O6-Gd1-O5 <sup>2</sup>               | 74.10(10)  | O12 <sup>2</sup> -Gd1-O6              | 82.15(12)  |
| O4-Gd1-O1 <sup>1</sup>               | 136.03(10) | O6-Gd1-O7                            | 75.97(11)  | O12 <sup>2</sup> -Gd1-O7              | 140.73(10) |
| O4-Gd1-O3                            | 73.31(12)  | O6-Gd1-O8 <sup>1</sup>               | 70.94(11)  | O12 <sup>2</sup> -Gd1-O8 <sup>1</sup> | 125.02(11) |
| O4-Gd1-O5 <sup>2</sup>               | 117.85(11) | O7-Gd1-O1 <sup>1</sup>               | 71.35(10)  | O12 <sup>2</sup> -Gd1-O13             | 76.41(12)  |
| O4-Gd1-O6                            | 72.96(11)  | O7-Gd1-O5 <sup>2</sup>               | 143.80(9)  | O13-Gd1-O1 <sup>1</sup>               | 73.20(10)  |
| O4-Gd1-O7                            | 71.01(11)  | O8 <sup>1</sup> -Gd1-O1 <sup>1</sup> | 51.75(9)   | O13-Gd1-O3                            | 70.75(10)  |
| O4-Gd1-O8 <sup>1</sup>               | 136.66(12) | O8 <sup>1</sup> -Gd1-O3              | 127.36(11) | O13-Gd1-O5 <sup>2</sup>               | 71.13(10)  |
| O4-Gd1-O12 <sup>2</sup>              | 71.58(11)  | O8 <sup>1</sup> -Gd1-O5 <sup>2</sup> | 73.72(11)  | O8 <sup>1</sup> -Gd1-O7               | 77.62(11)  |

<sup>1</sup>2+X,3/2-Y,1/2+Z; <sup>2</sup>3-X,1-Y,1-Z; <sup>3</sup>-2+X,3/2-Y,-1/2+Z

| Bond                    | Angle (°)  | Bond                                 | Angle (°)  | Bond                    | Angle (°)  |
|-------------------------|------------|--------------------------------------|------------|-------------------------|------------|
| O1 <sup>1</sup> -Dy1-O6 | 106.47(8)  | O3-Dy1-O5 <sup>1</sup>               | 71.09(9)   | O9-Dy1-O1 <sup>1</sup>  | 147.79(9)  |
| O2-Dy1-O1 <sup>1</sup>  | 135.87(8)  | O3-Dy1-O6                            | 74.06(9)   | O9-Dy1-O3               | 82.75(10)  |
| O2-Dy1-O3               | 73.04(9)   | O3-Dy1-O12                           | 142.02(9)  | O9-Dy1-O4               | 77.04(11)  |
| O2-Dy1-O4               | 124.31(10) | O3-Dy1-O13                           | 75.46(9)   | O9-Dy1-O5 <sup>1</sup>  | 125.30(9)  |
| O2-Dy1-O5 <sup>1</sup>  | 137.25(9)  | O4-Dy1-O1 <sup>1</sup>               | 72.29(10)  | O9-Dy1-O6               | 53.16(8)   |
| O2-Dy1-O6               | 117.49(8)  | O4-Dy1-O5 <sup>1</sup>               | 98.43(10)  | O9-Dy1-O12              | 102.87(10) |
| O2-Dy1-O9               | 71.11(8)   | O4-Dy1-O6                            | 71.45(9)   | O9-Dy1-O13              | 140.65(9)  |
| O2-Dy1-O12              | 73.52(9)   | O4-Dy1-O13                           | 135.89(10) | O12-Dy1-O1 <sup>1</sup> | 76.13(8)   |
| O2-Dy1-O13              | 71.36(8)   | O5 <sup>1</sup> -Dy1-O1 <sup>1</sup> | 52.09(7)   | O12-Dy1-O4              | 70.64(9)   |
| O3-Dy1-O1 <sup>1</sup>  | 118.24(8)  | O5 <sup>1</sup> -Dy1-O6              | 73.45(8)   | O12-Dy1-O5 <sup>1</sup> | 127.35(8)  |
| O3-Dy1-O4               | 145.50(10) | O5 <sup>1</sup> -Dy1-O13             | 77.74(9)   | O12-Dy1-O6              | 138.96(9)  |

<sup>1</sup>1-X,-1/2+Y,3/2-Z; <sup>2</sup>1-X,1/2+Y,3/2-Z; <sup>3</sup>-1-X,1-Y,1-Z

| Bond                                 | Angle (°) | Bond                                 | Angle (°) | Bond                                  | Angle (°) |
|--------------------------------------|-----------|--------------------------------------|-----------|---------------------------------------|-----------|
| O2 <sup>2</sup> -Sm1-O1 <sup>1</sup> | 106.52(6) | O5-Sm1-O1 <sup>1</sup>               | 135.80(7) | O9-Sm1-O1 <sup>1</sup>                | 71.23(7)  |
| O3-Sm1-O1 <sup>1</sup>               | 76.82(6)  | O5-Sm1-O2 <sup>2</sup>               | 117.43(6) | O9-Sm1-O2 <sup>2</sup>                | 143.67(7) |
| O3-Sm1-O2 <sup>2</sup>               | 139.11(7) | O5-Sm1-O3                            | 73.37(7)  | O10-Sm1-O1 <sup>1</sup>               | 73.30(8)  |
| O3-Sm1-O7 <sup>1</sup>               | 127.15(7) | O5-Sm1-O4                            | 72.89(8)  | O10-Sm1-O2 <sup>2</sup>               | 71.73(8)  |
| O3-Sm1-O9                            | 76.84(7)  | O5-Sm1-O7 <sup>1</sup>               | 136.55(7) | O10-Sm1-O3                            | 70.47(8)  |
| O4-Sm1-O1 <sup>1</sup>               | 117.27(7) | O5-Sm1-O9                            | 70.72(7)  | O10-Sm1-O7 <sup>1</sup>               | 99.55(8)  |
| O4-Sm1-O2 <sup>2</sup>               | 74.33(7)  | O5-Sm1-O10                           | 123.89(8) | O10-Sm1-O9                            | 136.04(9) |
| O4-Sm1-O3                            | 141.58(8) | O5-Sm1-O11 <sup>2</sup>              | 71.51(7)  | O11 <sup>2</sup> -Sm1-O1 <sup>1</sup> | 148.36(7) |
| O4-Sm1-O7 <sup>1</sup>               | 70.81(7)  | O7 <sup>1</sup> -Sm1-O1 <sup>1</sup> | 51.30(6)  | O11 <sup>2</sup> -Sm1-O2 <sup>2</sup> | 52.42(6)  |
| O4-Sm1-O9                            | 75.14(7)  | O7 <sup>1</sup> -Sm1-O2 <sup>2</sup> | 74.20(6)  | O11 <sup>2</sup> -Sm1-O3              | 103.68(8) |
| O4-Sm1-O10                           | 146.07(8) | O7 <sup>1</sup> -Sm1-O9              | 77.53(7)  | O11 <sup>2</sup> -Sm1-O4              | 82.40(8)  |

<sup>1</sup>2+X,1/2-Y,1/2+Z; <sup>2</sup>3-X,1-Y,1-Z; <sup>3</sup>-2+X,1/2-Y,-1/2+Z

**Table S4.** The molar ratio of Eu/Tb in compounds produced by ICP.

| Sample                                                     | The molar of the starting Eu/Tb salt | The molar by ICP analysis |
|------------------------------------------------------------|--------------------------------------|---------------------------|
| Eu <sub>0.002</sub> Tb <sub>0.018</sub> -MOF (Eu: Tb=1: 9) | 0.002:0.018                          | 0.00223: 0.01777          |
| Eu <sub>0.004</sub> Tb <sub>0.016</sub> -MOF (Eu: Tb=2: 8) | 0.004:0.016                          | 0.00419: 0.01581          |
| Eu <sub>0.006</sub> Tb <sub>0.014</sub> -MOF (Eu: Tb=3: 7) | 0.006:0.014                          | 0.00607: 0.01393          |
| Eu <sub>0.008</sub> Tb <sub>0.012</sub> -MOF (Eu: Tb=4: 6) | 0.008:0.012                          | 0.00811: 0.01189          |
| Eu <sub>0.010</sub> Tb <sub>0.010</sub> -MOF (Eu: Tb=5: 5) | 0.010:0.010                          | 0.01002: 0.00998          |
| Eu <sub>0.012</sub> Tb <sub>0.008</sub> -MOF (Eu: Tb=6: 4) | 0.012:0.008                          | 0.01198: 0.00802          |
| Eu <sub>0.014</sub> Tb <sub>0.006</sub> -MOF (Eu: Tb=7: 3) | 0.014:0.006                          | 0.01392: 0.00608          |
| Eu <sub>0.016</sub> Tb <sub>0.004</sub> -MOF (Eu: Tb=8: 2) | 0.016:0.004                          | 0.01587: 0.00413          |
| Eu <sub>0.018</sub> Tb <sub>0.002</sub> -MOF (Eu: Tb=9: 1) | 0.018:0.002                          | 0.01782: 0.00218          |

**Table S5.** Composition, working ranges (K), maximum relative sensitivity values ( $S_m$ , % K<sup>-1</sup>), and the temperature at which  $S_m$  is maximum ( $T_m$ , K) of luminescent MOF thermometers.

| Luminescent thermometer                                                                     | Range (K) | $S_m$ (% K <sup>-1</sup> ) | $T_m$ | Ref.      |
|---------------------------------------------------------------------------------------------|-----------|----------------------------|-------|-----------|
| Eu <sub>0.002</sub> Tb <sub>0.018</sub> -BDPO                                               | 303-423   | 2.4                        | 423   | This work |
| Eu <sub>0.004</sub> Tb <sub>0.016</sub> -BDPO                                               | 303-423   | 1.7                        | 423   | This work |
| Eu <sub>0.002</sub> Tb <sub>0.018</sub> -BDPO@PVA                                           | 303-423   | 3.7                        | 423   | This work |
| Tb <sub>0.80</sub> Eu <sub>0.20</sub> BPDA                                                  | 298-318   | 1.19                       | 313   | 6         |
| Tb <sub>0.9</sub> Eu <sub>0.1</sub> -HPIDC-OX                                               | 303-473   | 0.6                        | 473   | 7         |
| Eu <sub>0.2</sub> Tb <sub>0.8</sub> L                                                       | 40-300    | 0.15                       | 300   | 8         |
| Tb <sub>0.95</sub> Eu <sub>0.05</sub> cpna                                                  | 25-300    | 2.55                       | 131   | 9         |
| Tb <sub>0.99</sub> Eu <sub>0.01</sub> (BDC) <sub>1.5</sub> ·(H <sub>2</sub> O) <sub>2</sub> | 290-320   | 0.31                       | 318   | 10        |
| Eu <sub>0.0069</sub> Tb <sub>0.9931</sub> -DMBDC                                            | 50-200    | 1.15                       | 200   | 11        |
| Tb <sub>0.9</sub> Eu <sub>0.1</sub> -L                                                      | 303-423   | 1.75                       | 423   | 12        |

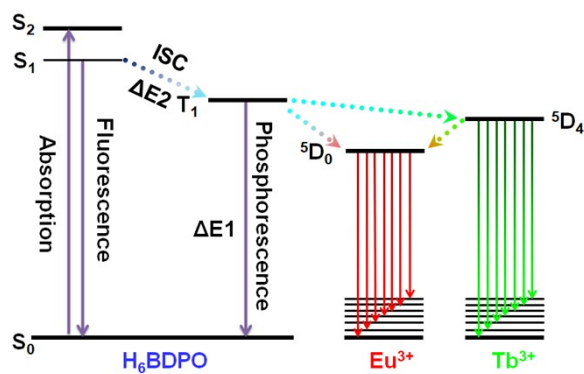

**Scheme 1.** Schematic representation of the energy adsorption, transfer, and emission processes of Ln-MOF.

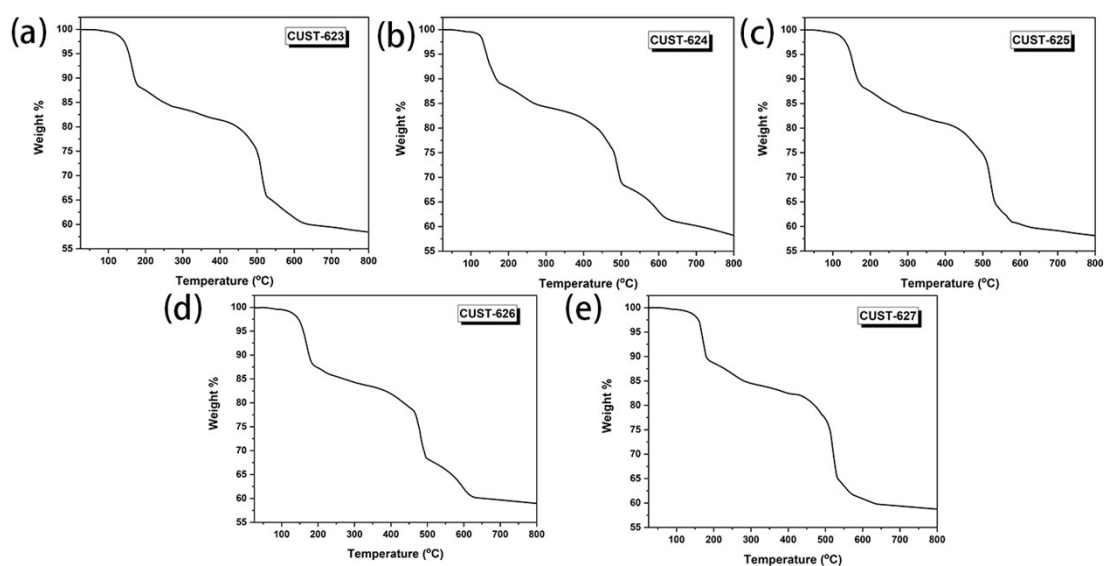

**Figure S1.** TGA curve of CUST-623 - CUST-627

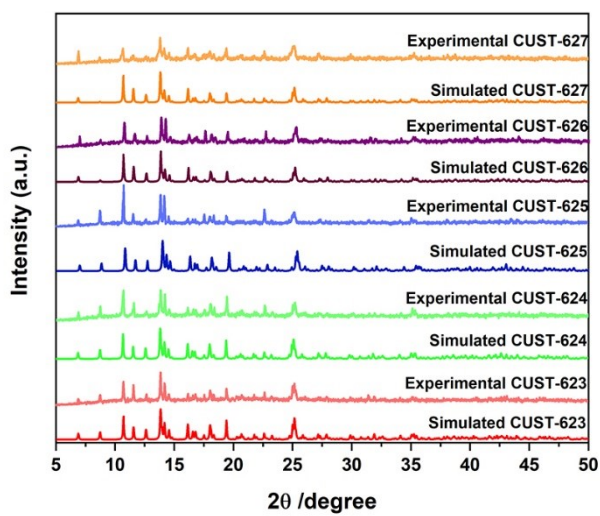

**Figure S2.** Powder X-ray diffraction patterns of CUST-623 - CUST-627.

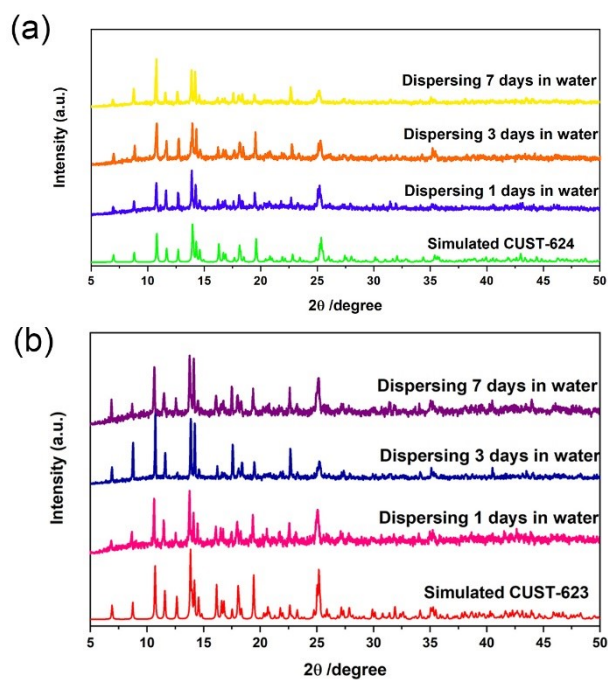

Figure S3. Powder X-ray diffraction patterns of CUST-623 and CUST-624 in water.

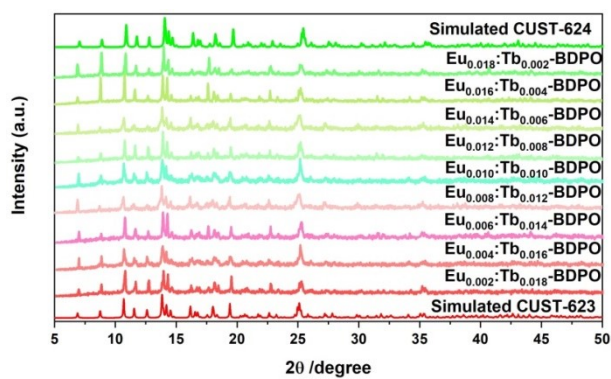

Figure S4. Powder X-ray diffraction patterns of  $\text{Eu}_x\text{Tb}_{0.02-x}\text{-BDPO}$ .

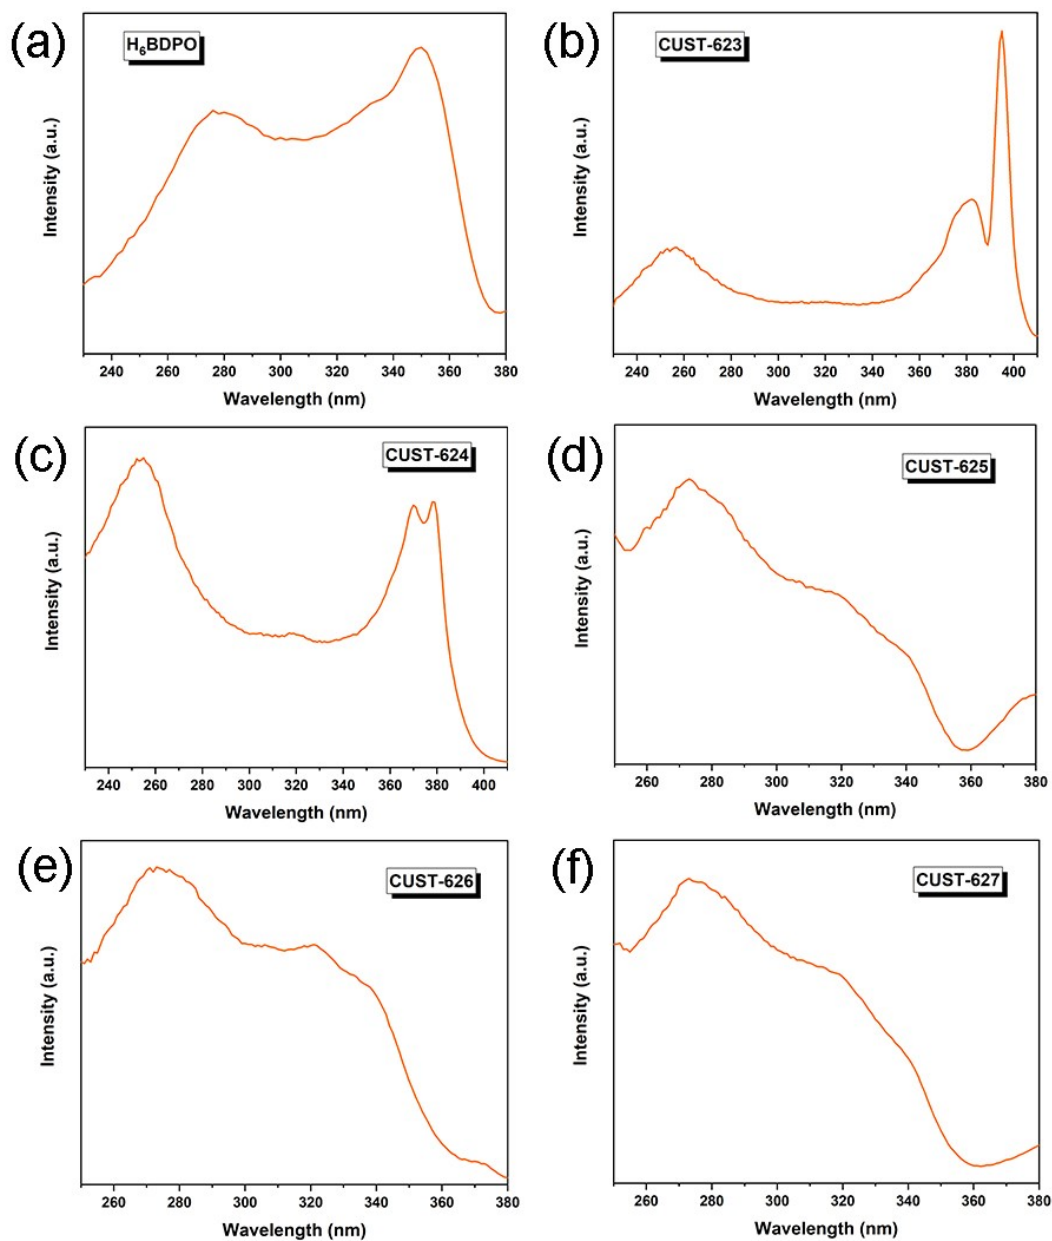

Figure S5. The solid-state excitation spectra H<sub>6</sub>BDPO and CUST-623 - CUST-627.



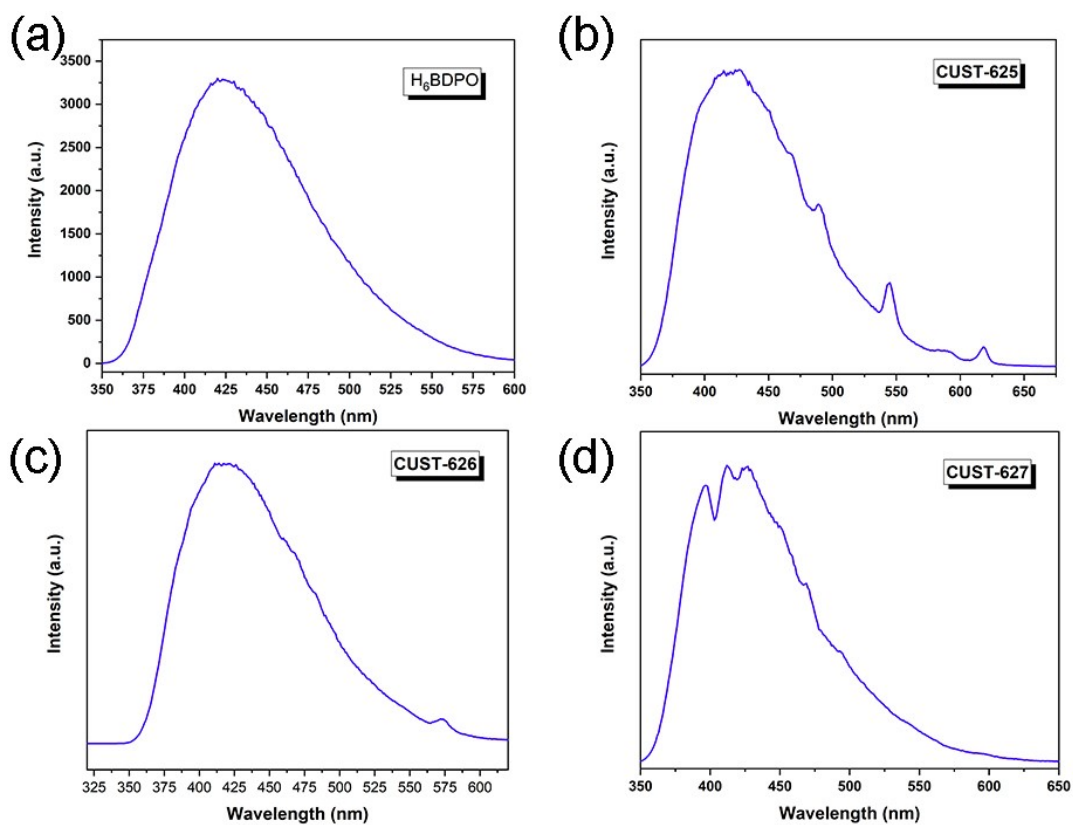

**Figure S6.** The solid-state emission  $H_6BDPO$  and CUST-625- CUST-627

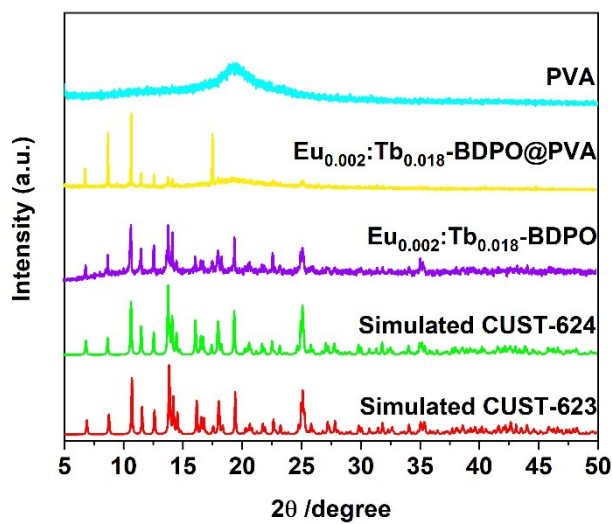

**Figure S7.** PXRD patterns of  $Eu_{0.002}Tb_{0.018}$ -BDPO, Polyvinyl Alcohol (PVA),  $Eu_{0.002}Tb_{0.018}$ -BDPO@PVA membranes and simulated PRXD pattern of Ln-MOFs.

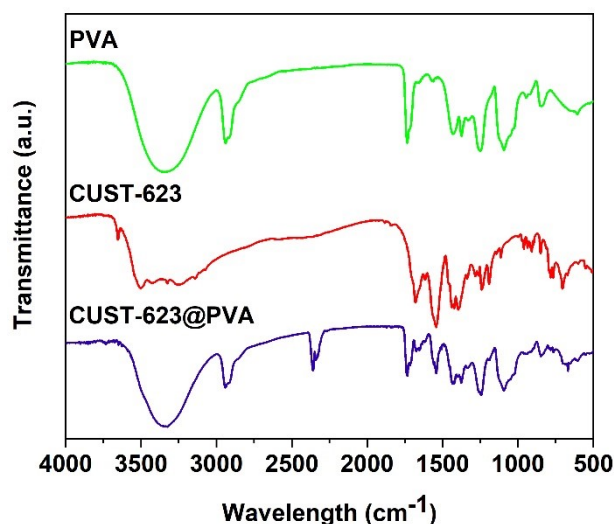

Figure S8. FTIR spectra of Ln-MOFs, Polyvinyl Alcohol (PVA), Ln-MOF@PVA

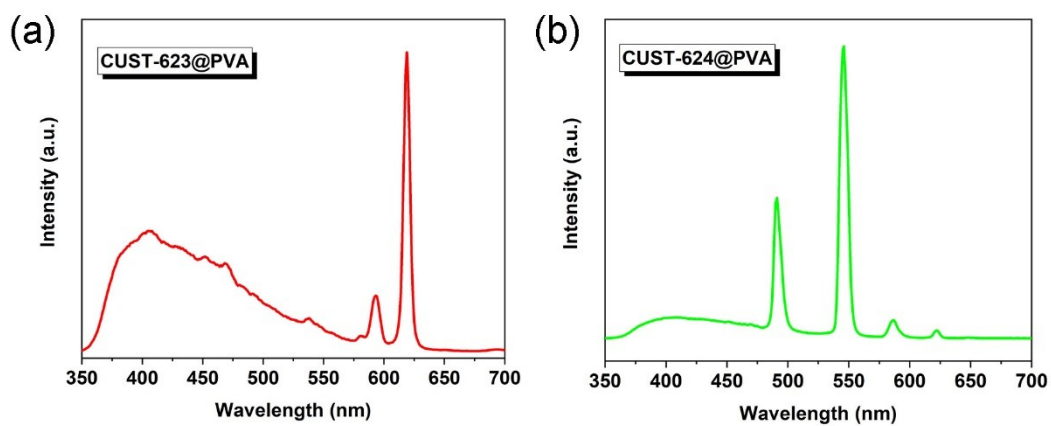

Figure S9. Emission spectra of (a) CUST-623@PVA membrane, (b) CUST-624@PVA membrane

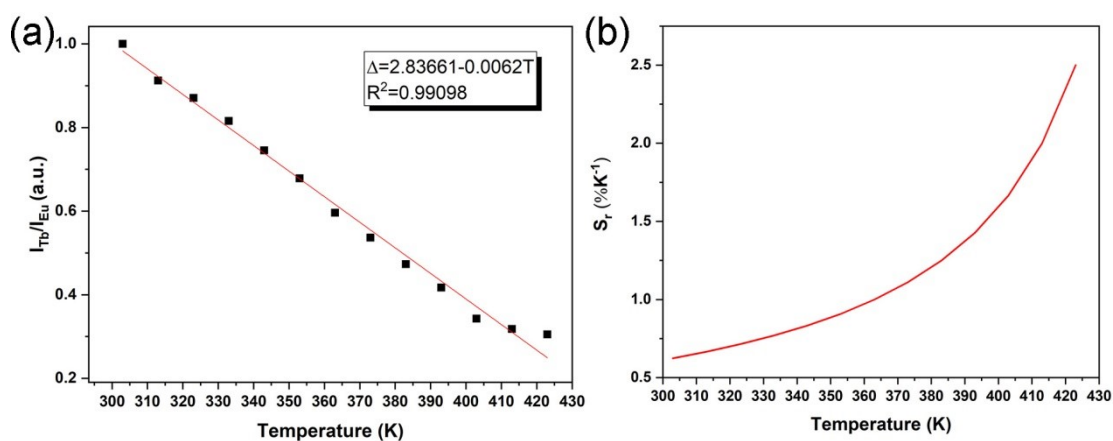

Figure S10. (a) Temperature-dependent intensity ratio of  $I_{Eu}/I_{Tb}$  and linearly fitted curve of  $Eu_{0.002}Tb_{0.018}$ -MOF. (b) The relative sensitivity values ( $S_r$ ) of  $Eu_{0.002}Tb_{0.018}$ -MOF.

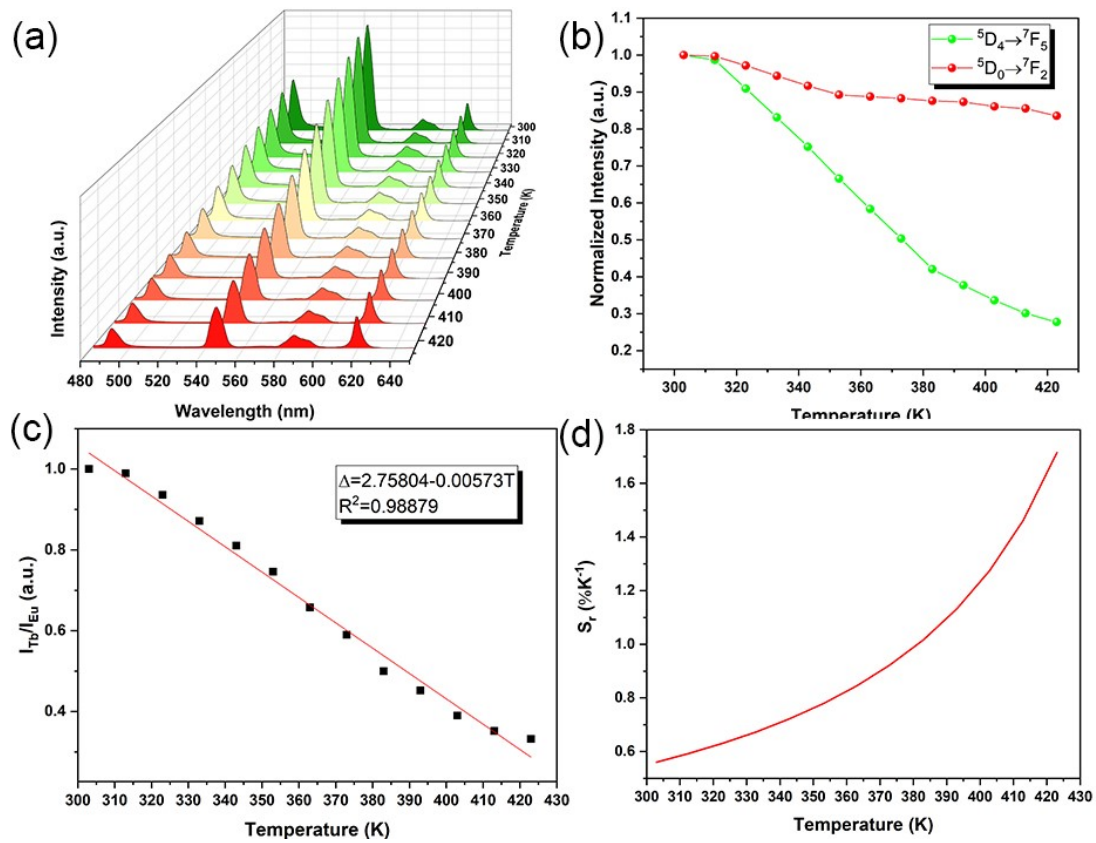

**Figure S11.** (a) Emission spectra of  $\text{Eu}_{0.004}\text{Tb}_{0.016}\text{-MOF}$  recorded at 303 K - 423 K. (b) The normalized intensities of  $\text{Eu}_{0.004}\text{Tb}_{0.016}\text{-MOF}$ . (c) Temperature-dependent intensity ratio of  $I_{\text{Eu}}/I_{\text{Tb}}$  and linearly fitted curve. (d) The relative sensitivity values ( $S_r$ ) of  $\text{Eu}_{0.004}\text{Tb}_{0.016}\text{-MOF}$ .

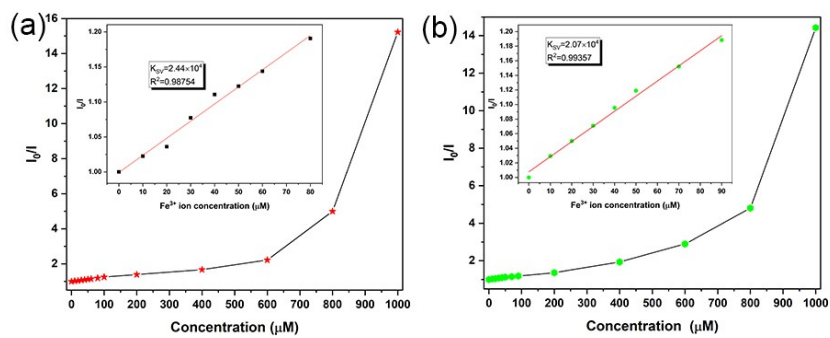

**Figure S12.** The S-V plot of CUST-623 and CUST-624 of  $\text{Fe}^{3+}$ .

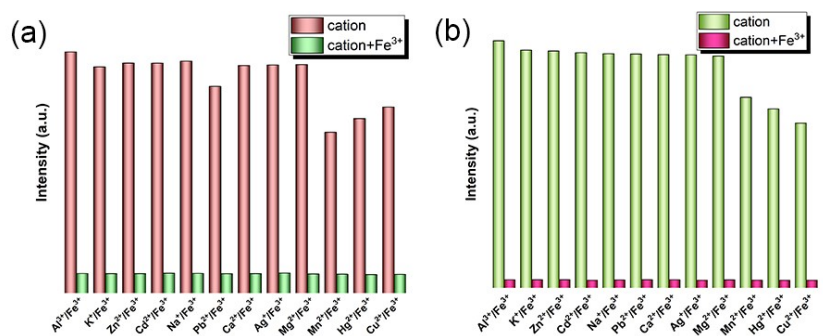

**Figure S13.** Detect the anti-interference performance spectra of Fe<sup>3+</sup> ions of CUST-623 (a) and CUST-624 (b).

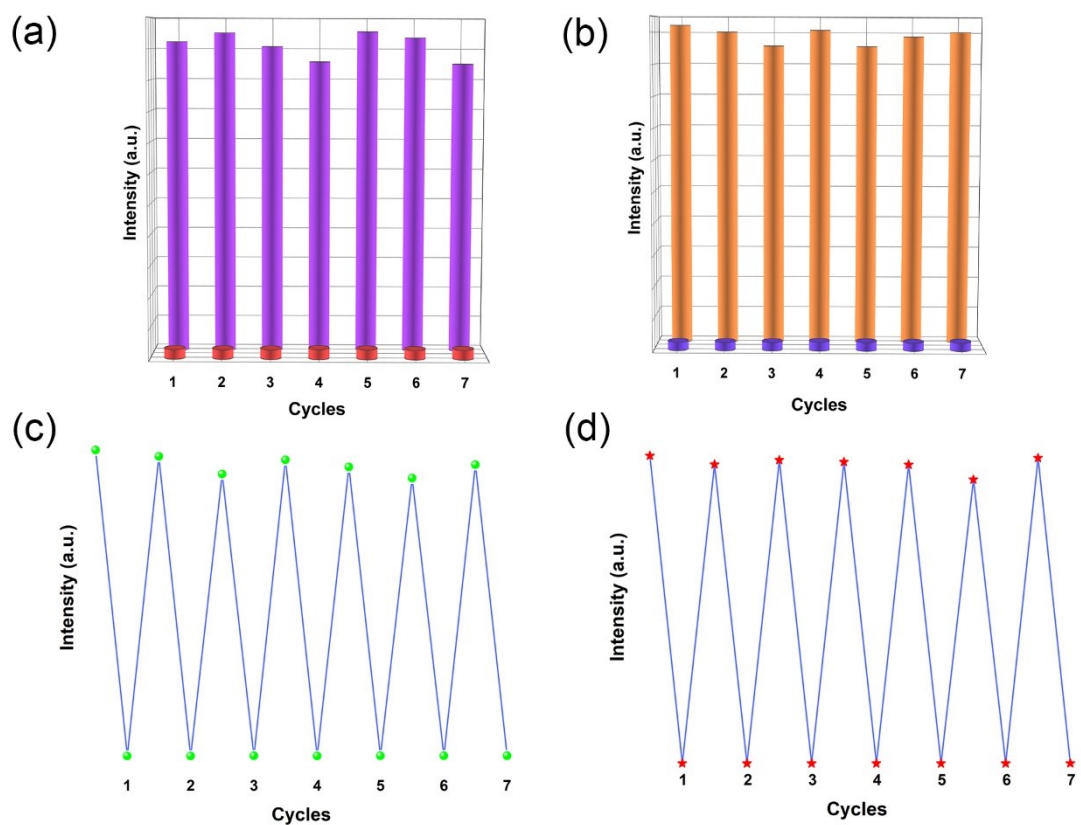

**Figure S14.** The recovery tests of CUST-623 (a) and CUST-624 (b) in water of Cr<sub>2</sub>O<sub>7</sub><sup>2-</sup> ion. The recovery tests of CUST-623 (a) and CUST-624 (b) in water of CrO<sub>4</sub><sup>2-</sup> ion.

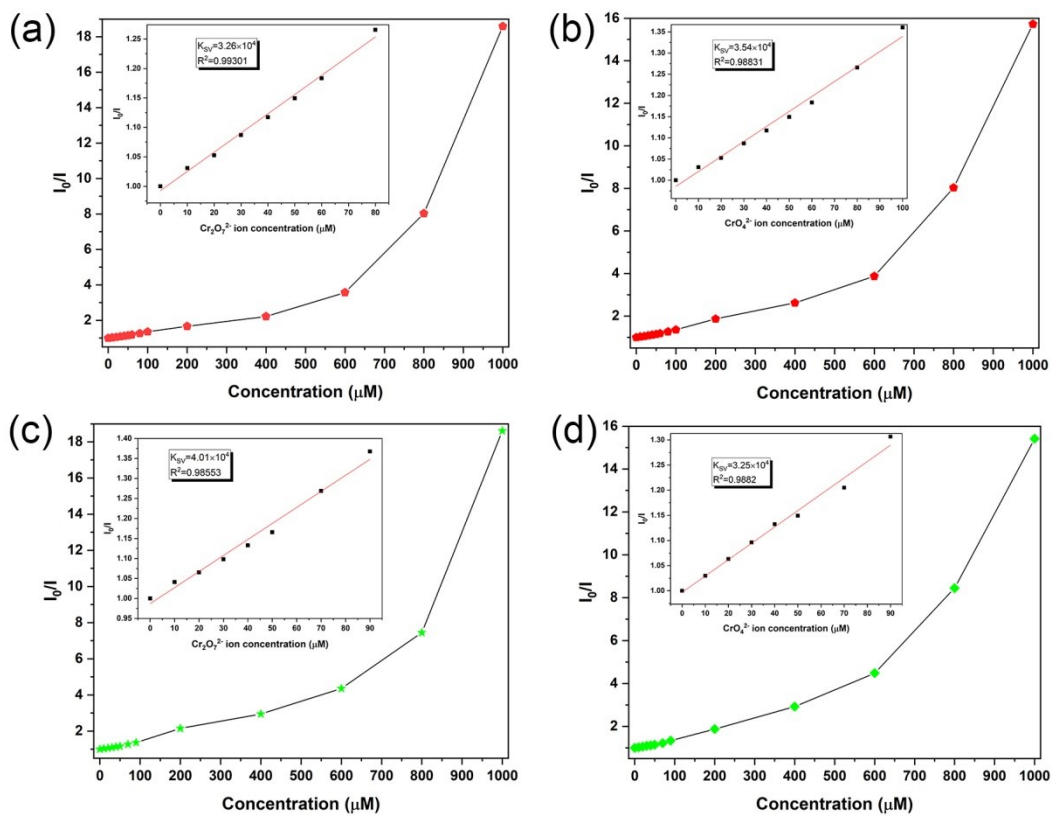

**Figure S15.** The S–V plot of CUST-623 of (a)  $\text{Cr}_2\text{O}_7^{2-}$  and (b)  $\text{CrO}_4^{2-}$ . The S–V plot of CUST-624 of (c)  $\text{Cr}_2\text{O}_7^{2-}$  and (d)  $\text{CrO}_4^{2-}$ . Inset: the linearity relationship of luminescent quenching at low concentrations.

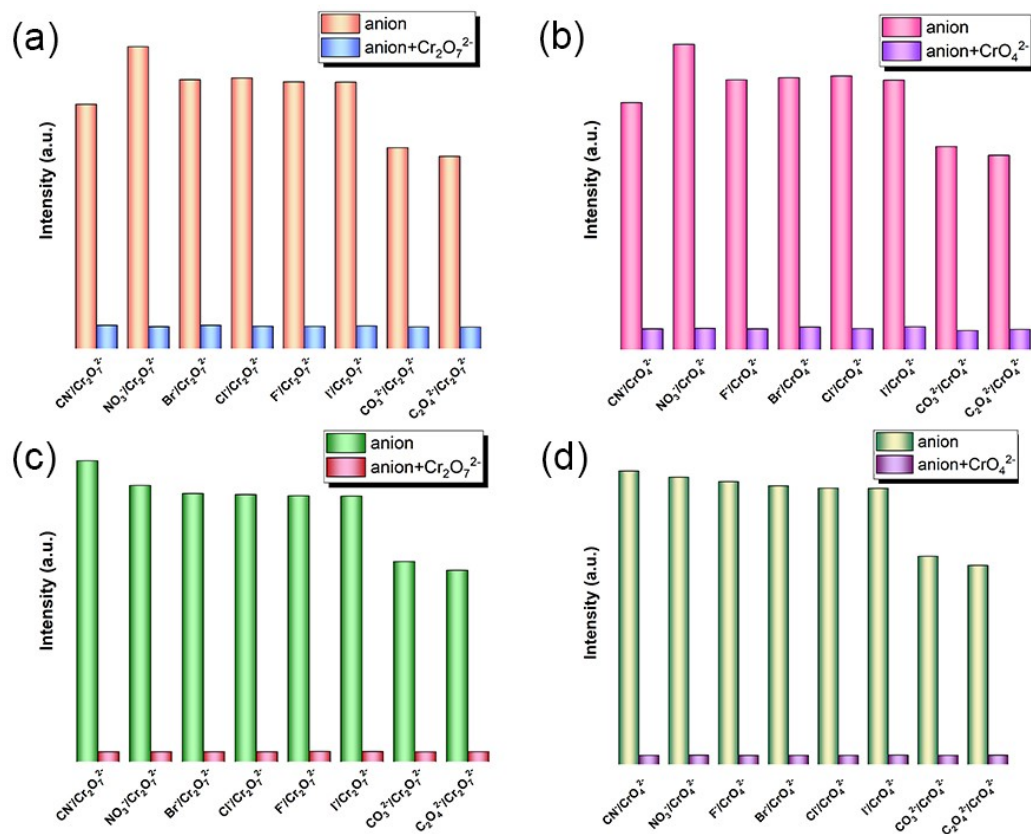

**Figure S16.** Detect the anti-interference performance spectra of  $\text{Cr}_2\text{O}_7^{2-}$  ions of CUST-623 (a) and CUST-624 (b). Detect the anti-interference performance spectra of  $\text{CrO}_4^{2-}$  ions of CUST-623 (c) and CUST-624 (d).

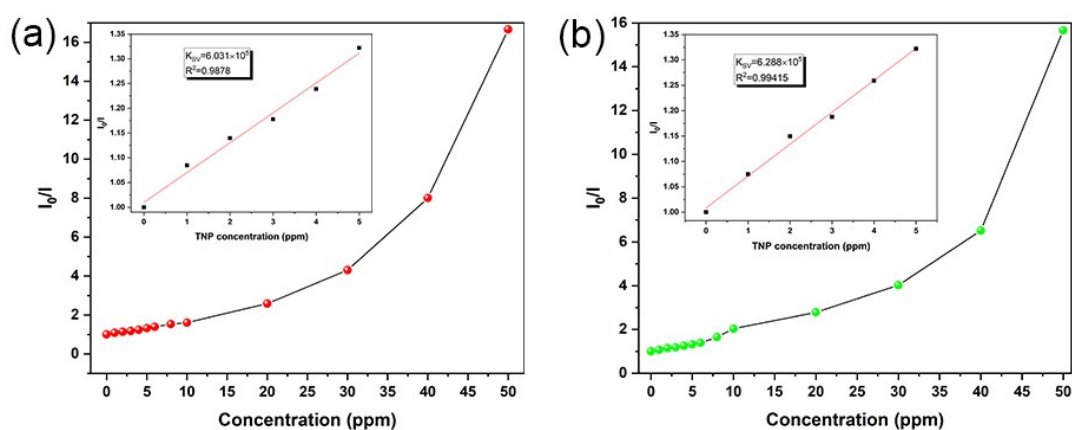

**Figure S17.** The S-V plot of TNP of (a) CUST-623 and (b) CUST-624. Inset: the linearity relationship of luminescent quenching at low concentrations.

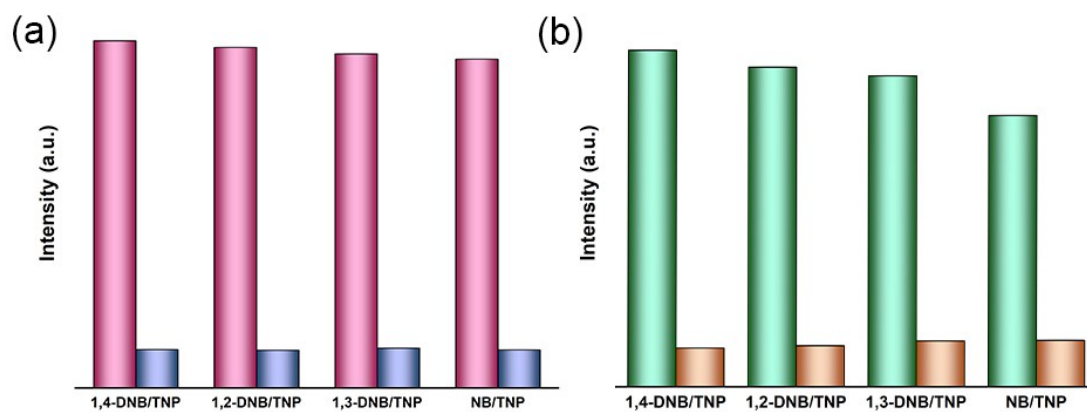

**Figure S18.** Detect the anti-interference performance spectra of TNP ions of CUST-623 (a) and CUST-624 (b).

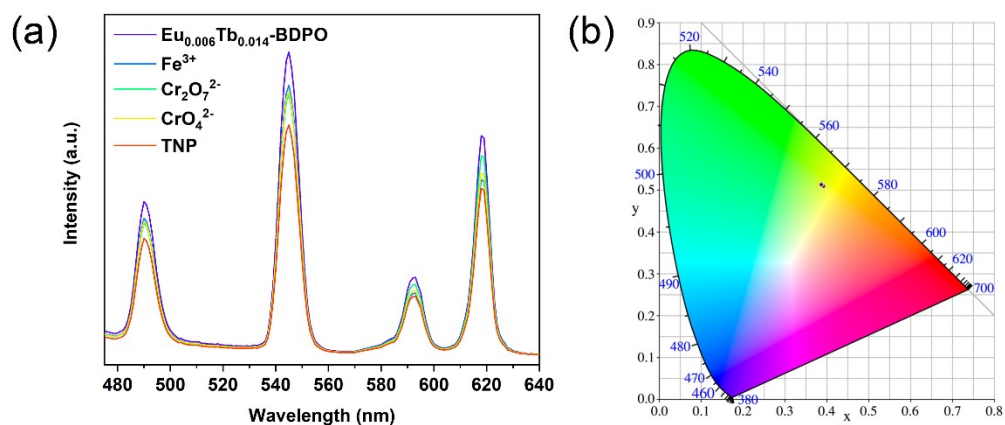

**Figure S19.** (a) The fluorescence profiles of  $\text{Eu}_{0.006}\text{Tb}_{0.14}\text{-BDPO}$  after addition of  $\text{Fe}^{3+}$  (50  $\mu\text{M}$ ),  $\text{Cr}_2\text{O}_7^{2-}$  (50  $\mu\text{M}$ ),  $\text{CrO}_4^{2-}$  (50  $\mu\text{M}$ ), TNP (5 ppm). (b) CIE coordinates for the response of  $\text{Eu}_{0.006}\text{Tb}_{0.14}\text{-BDPO}$  to analytes.

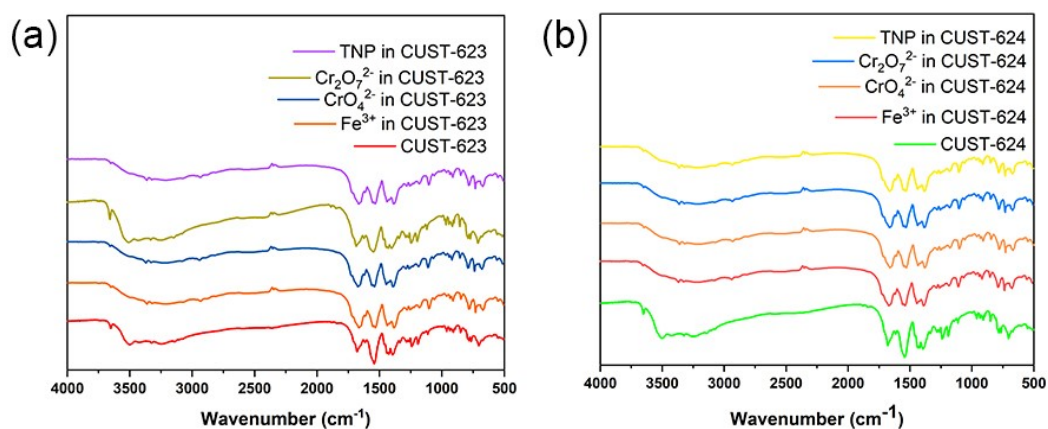

**Figure S20.** IR spectra of CUST-623 (a) and CUST-624 (b) in different solution.

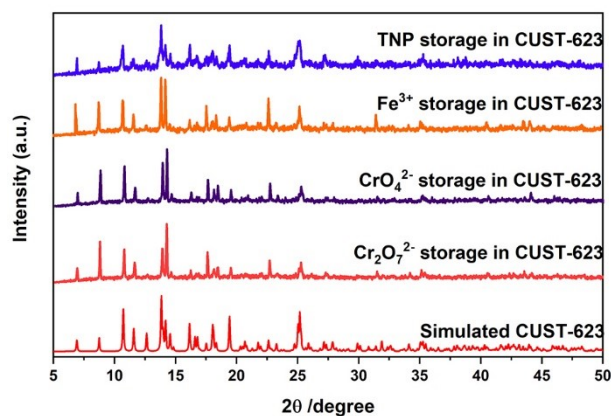

Figure S21. PXRD patterns of CUST-623 after storage  $\text{Fe}^{3+}$ ,  $\text{Cr}_2\text{O}_7^{2-}$ ,  $\text{CrO}_4^{2-}$ , TNP.

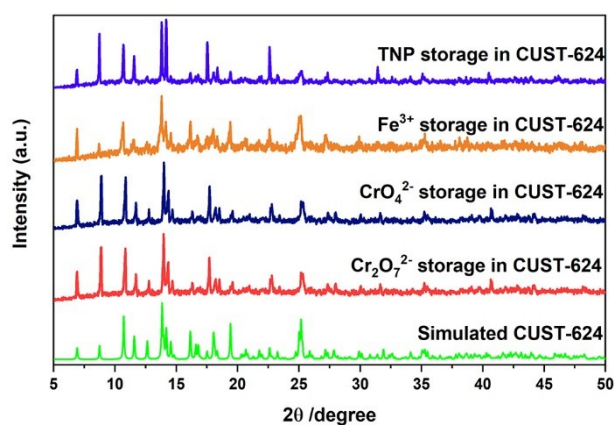

Figure S22. PXRD patterns of CUST-624 after storage  $\text{Fe}^{3+}$ ,  $\text{Cr}_2\text{O}_7^{2-}$ ,  $\text{CrO}_4^{2-}$ , TNP.

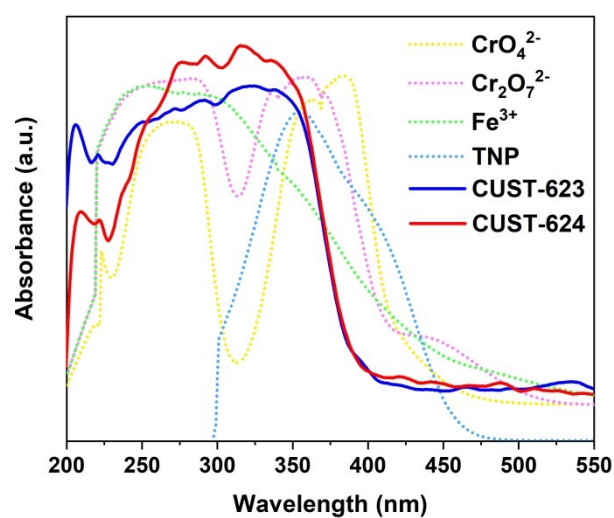

Figure S23. The UV-vis absorption spectra of CUST-623, CUST-624 and TNP,  $\text{Fe}^{3+}$ ,  $\text{Cr}_2\text{O}_7^{2-}$ ,  $\text{CrO}_4^{2-}$  ions in water.



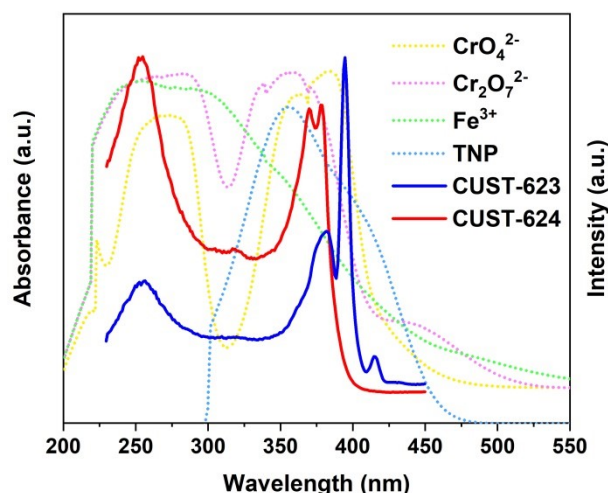

**Figure S24.** The UV-vis absorption spectra of TNP,  $\text{Cr}_2\text{O}_7^{2-}$ ,  $\text{CrO}_4^{2-}$ ,  $\text{Fe}^{3+}$  and the excitation spectra of CUST-623 and CUST-624.

### 3. Supporting References

- 1 X. Y. Li, W. J. Shi, X. Q. Wang, L. N. Ma, L. Hou, Y. Y. Wang, Luminescence modulation, white light emission, and energy transfer in a family of lanthanide metal–organic frameworks based on a planar  $\pi$ -conjugated ligand. *Cryst. Growth Des.*, 2017, **17**, 4217-4224.
- 2 G. M. Sheldrick, A short history of SHELX. *Acta Crystallogr. Sect. A: Found. Crystallogr.*, 2008, **64**, 112–122.
- 3 S. S. Nagarkar, B. A. K. Joarder, S. Chaudhari, Mukherjee and S. K. Ghosh, Highly selective detection of nitro explosives by a luminescent metal-organic framework. *Angew. Chem. Int. Ed.*, 2013, **52**, 2881-2885
- 4 M. Y. Fan, H. H. Yu, P. Fu, Z. M. Su, X. Li, X. L. Hu, Q. Q. Pan, Luminescent Cd (II) metal-organic frameworks with anthracene nitrogen-containing organic ligands as novel multifunctional chemosensors for the detection of picric acid, pesticides, and ferric ions. *Dyes Pigm.*, 2021, **185**, 108834.
- 5 E. J. McLaurin, L. R. Bradshaw, D. R. Gamelin, Dual-emitting nanoscale temperature sensors. *Chem. Mater.*, 2013, **25**, 1283-1292.
- 6 Y. Cui, H. Xu, Y. Yue, Z. Guo, J. Yu, Z. Chen, B. Chen, A luminescent mixed-lanthanide metal–organic framework thermometer. *J. Am. Chem. Soc.*, 2012, **134**, 3979-3982.
- 7 Y. Yang, H. P. Huang, Y. Z. Wang, F. Z. Qiu, Y. Feng, X. R. Song, X. L. Tang, G. L. Zhang, W. S. Liu, A family of mixed-lanthanide metal-organic frameworks thermometer in a wide temperature range. *Dalton Trans.*, 2018, **48**, 13384-13390
- 8 H. Wang, J. Xu, D. S. Zhang, Q. Chen, R. M. Wen, Z. Chang, X. H. Bu, Crystalline Capsules: Metal–Organic Frameworks Locked by Size-Matching Ligand Bolts. *Angew. Chem. Int. Ed.*, 2015, **54**, 5966-5970.
- 9 X. Lian, D. Zhao, Y. Cui, Y. Yang, G. Qian, A near infrared luminescent metal–organic framework for temperature sensing in the physiological range. *Chem. Comm.*, 2015, **51**, 17676-17679.
- 10 S. N. Zhao, L. J. Li, X. Z. Song, M. Zhu, Z. M. Hao, X. Meng, H. J. Zhang, Lanthanide ion codoped emitters for tailoring emission trajectory and temperature sensing. *Adv. Funct. Mater.*, 2015, **25**, 1463-1469.
- 11 D. Zhao, D. Yue, K. Jiang, L. Zhang, C. Li, G. Qian, Isostructural  $\text{Tb}^{3+}/\text{Eu}^{3+}$  co-doped metal–organic framework based on pyridine-containing dicarboxylate ligands for ratiometric luminescence temperature sensing. *Inorg. Chem.*, 2019, **58**, 2637-2644.
- 12 Y. Yang, Y. Wang, Y. Feng, X. Song, C. Cao, G. Zhang, W. Liu, Three isostructural  $\text{Eu}^{3+}/\text{Tb}^{3+}$  co-doped MOFs for wide-range ratiometric temperature sensing. *Talanta*, 2020, **208**, 120354.
